# Supplementary material for: Enhanced carrier mobility-driven performance improvement in colloidal quantum dot solar cells
Source: Royal Society of Chemistry journal article supplement (doi:10.1039/d5qi02004b), 2025-12-24
Supplement: d5qi02004b1.pdf [file d5qi02004b1.pdf]

## Supplementary Information

### Enhanced Carrier Mobility-Driven Performance Improvement in Colloidal Quantum Dot Solar Cells

Yongwoo Jeon<sup>a,b¶</sup>, Hong Gu Kang<sup>c¶</sup>, Seohee Park<sup>a,b¶</sup>, Younghyun Kim<sup>d</sup>, Seong-Yong Cho<sup>c,d</sup>, Dennis T. Lee<sup>e</sup>, Younghoon Kim<sup>f</sup>, Byeong Guk Jeong<sup>g\*</sup>, Sohee Jeong<sup>b\*</sup>, Jung Hoon Song<sup>h\*</sup>, Ju Young Woo<sup>a,c,i\*</sup>

<sup>a</sup> Department of Autonomous Manufacturing & Process R&D, Korea Institute of Industrial Technology (KITECH), Ansan 15588, Republic of Korea

<sup>b</sup> Department of Energy Science (DOES), Center for Artificial Atoms, Institute of Energy Science and Technology (SIEST), Sungkyunkwan University (SKKU), Suwon 16419, Republic of Korea

<sup>c</sup> HYU-KITECH Joint Department, Hanyang University, Ansan 15588, Republic of Korea

<sup>d</sup> Department of Photonics and Nanoelectronics, Hanyang University, Ansan 15588, Korea

<sup>e</sup> Department of Materials Science and Chemical Engineering, Stony Brook University, Stony Brook, NY 11790, USA

<sup>f</sup> Department of Chemistry, Kookmin University, Seoul 02707, Republic of Korea

<sup>g</sup> Institute for Environment and Energy, School of Chemical Engineering, Pusan National University, Busan 46241, Republic of Korea

<sup>h</sup> Department of Semiconductor Engineering, Semiconductor Nanotechnology Research Institute, Mokpo National University, Muan 58554, Republic of Korea

<sup>i</sup> School of Integrative Engineering, Chung-Ang University, Seoul 06974, Republic of Korea

▽ These authors contributed equally to this work.

\*e-mail: [jywoo@kitech.re.kr](mailto:jywoo@kitech.re.kr) (Dr. Ju Young Woo)

\*e-mail: [jhsong@mnu.ac.kr](mailto:jhsong@mnu.ac.kr) (Prof. Jung Hoon Song)

\*e-mail: [s.jeong@skku.edu](mailto:s.jeong@skku.edu) (Prof. Sohee Jeong)

\*e-mail: [bgjeong@pusan.ac.kr](mailto:bgjeong@pusan.ac.kr) (Prof. Byeong Guk Jeong)

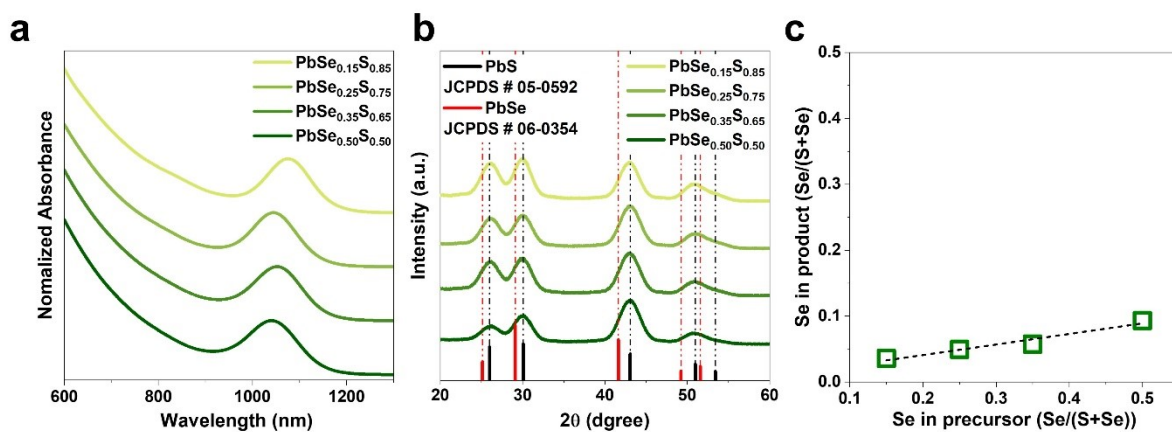

Figure S 1. (a) Absorption spectra, (b) XRD patterns, and (c) actual Se composition determined by ICP analysis of ternary PbSSe quantum dots synthesized without a highly reactive Se precursor, as a function of anion ratio.

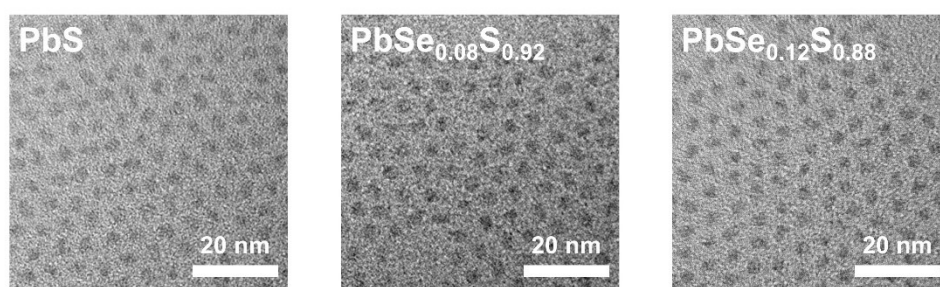

Figure S 2. TEM images of PbS quantum dots and ternary PbSSe quantum dots synthesized with the addition of a highly reactive Se precursor.

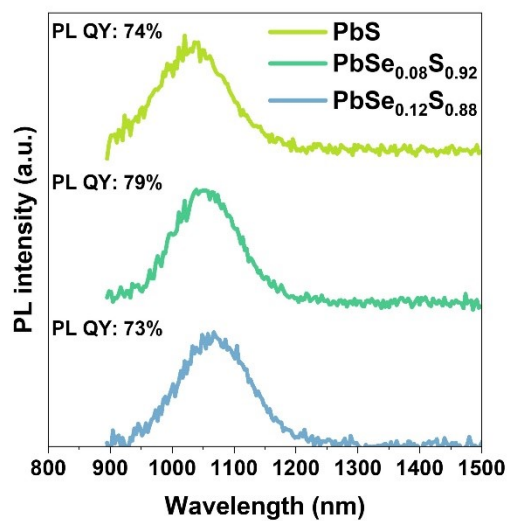

Figure S 3. Photoluminescence quantum yield (PL QY) comparison between binary PbS quantum dots and ternary PbSeS quantum dots.

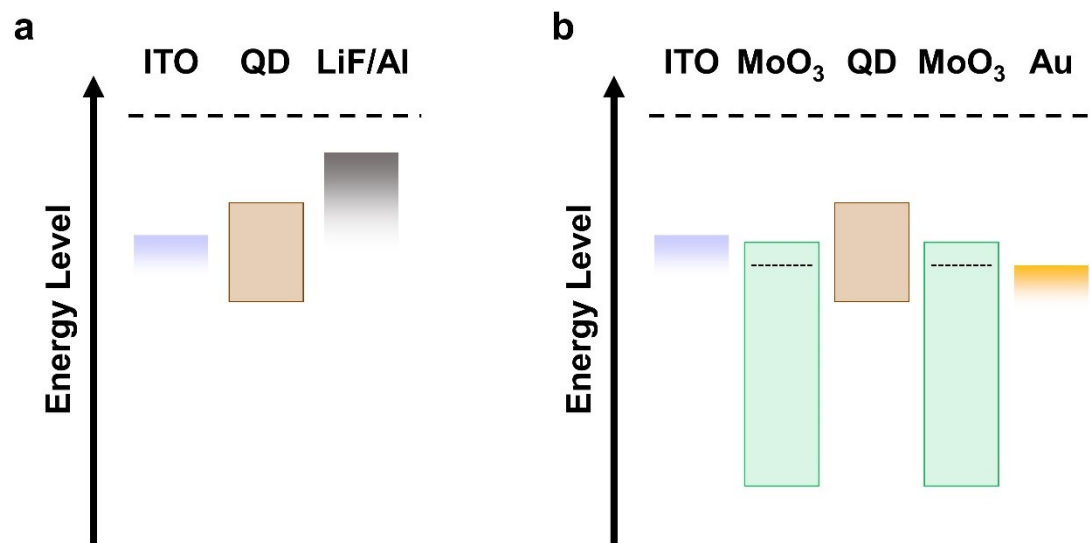

Figure S 4. Energy band diagrams for SCLC measurements: (a) electron-only device (EOD) and (b) hole-only device (HOD).

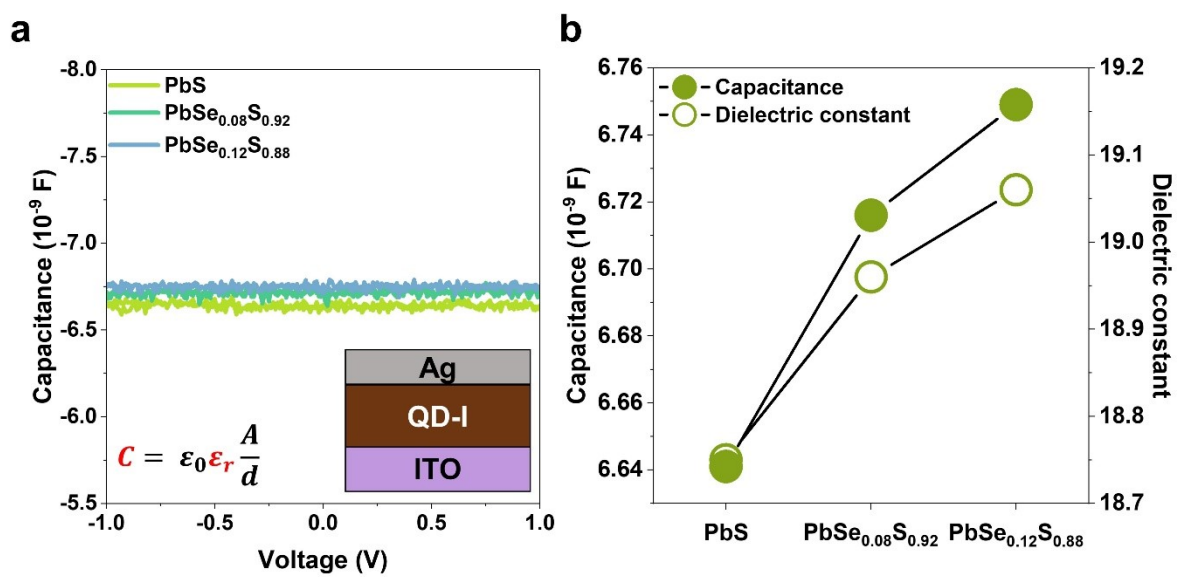

Figure S 5. (a) Capacitance as a function of voltage sweep for different anion compositions, and (b) dielectric constants calculated from the measured capacitance values.

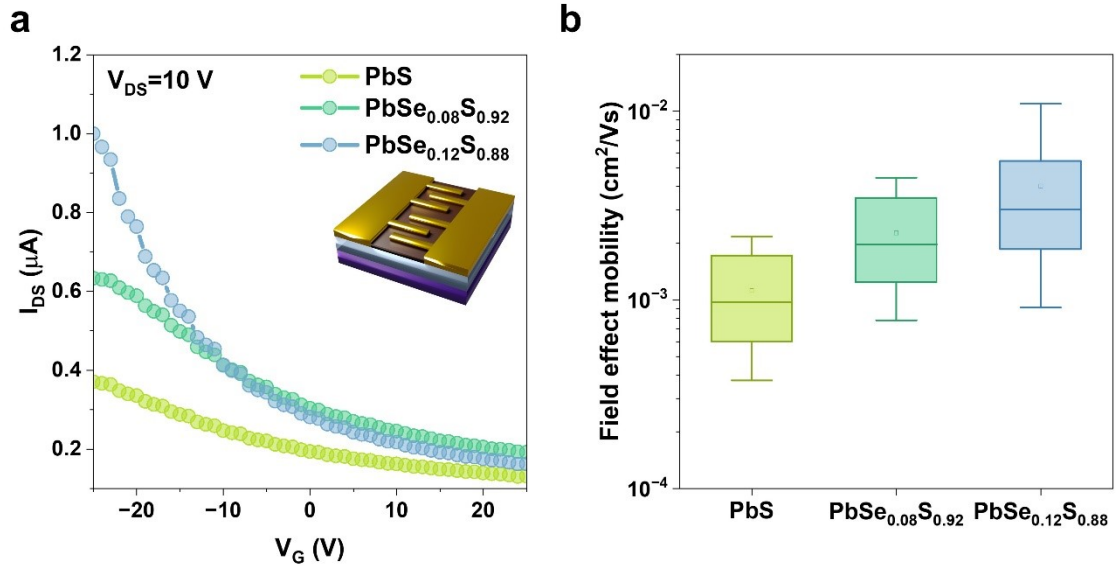

Figure S 6. (a) Transfer curves of FETs based on PbS and ternary PbSeS quantum dots. (channel length: 5  $\mu\text{m}$ ; width: 300  $\mu\text{m}$ ) (b) Field-effect mobility of majority carrier (hole) extracted in the linear regime.

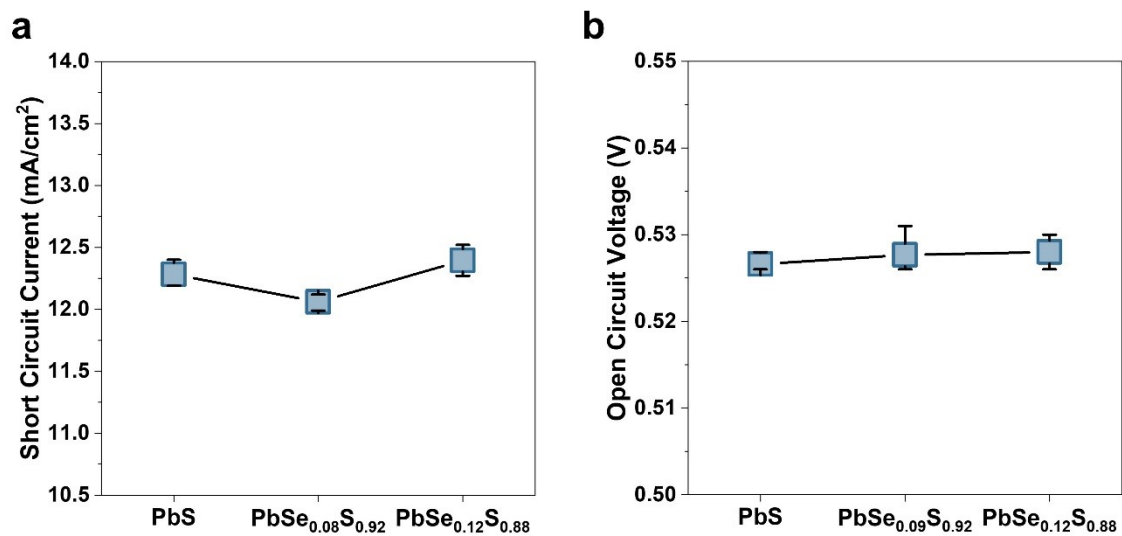

Figure S 7. (a) Short-circuit current density ( $J_{sc}$ ) and (b) open-circuit voltage ( $V_{oc}$ ) of fully depleted devices with identical active layer thickness, as a function of Se composition.

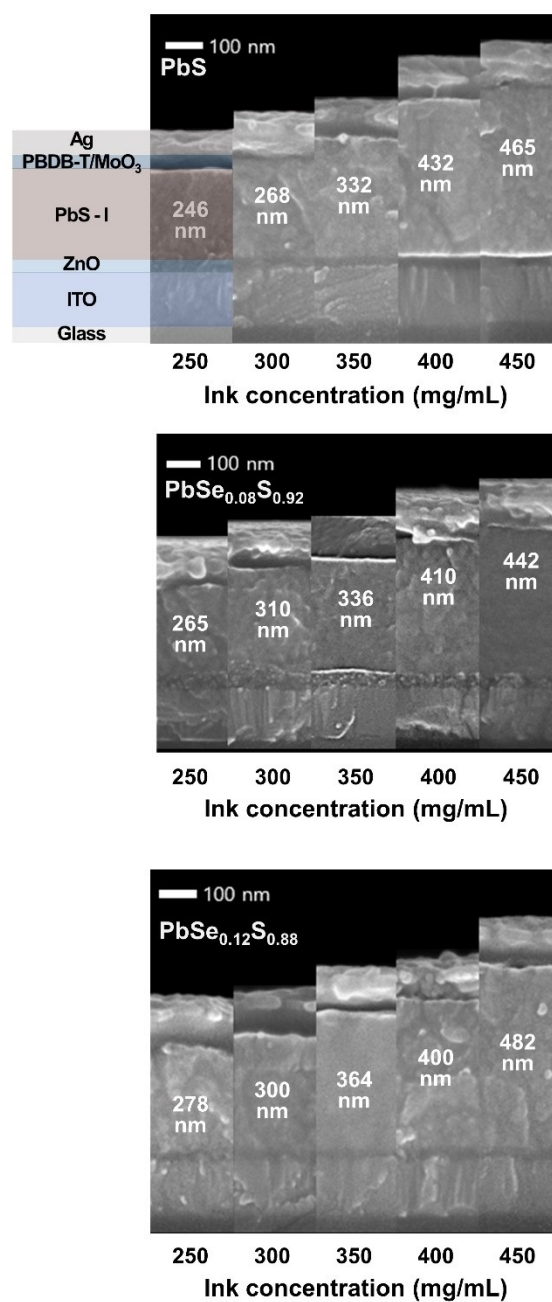

Figure S 8. Cross-sectional SEM images of devices fabricated with varying ink concentrations for each anion composition.

| <b>PbS</b>                                       | <b>246 nm</b> | <b>268 nm</b> | <b>332 nm</b> | <b>432 nm</b> | <b>465 nm</b> |
|--------------------------------------------------|---------------|---------------|---------------|---------------|---------------|
| <b>Short circuit current (mA/cm<sup>2</sup>)</b> | 23.79         | 23.64         | 24.85         | 25.83         | 23.60         |
| <b>Open circuit voltage (V)</b>                  | 0.556         | 0.550         | 0.550         | 0.554         | 0.539         |
| <b>Fill factor (%)</b>                           | 56.67         | 53.64         | 54.05         | 51.82         | 45.75         |
| <b>Power conversion efficiency (%)</b>           | 7.50          | 6.97          | 7.40          | 7.41          | 5.82          |

  

| <b>PbSe<sub>0.08</sub>S<sub>0.92</sub></b>       | <b>265 nm</b> | <b>310 nm</b> | <b>336 nm</b> | <b>410 nm</b> | <b>442 nm</b> |
|--------------------------------------------------|---------------|---------------|---------------|---------------|---------------|
| <b>Short circuit current (mA/cm<sup>2</sup>)</b> | 24.68         | 23.89         | 25.11         | 27.23         | 26.70         |
| <b>Open circuit voltage (V)</b>                  | 0.558         | 0.551         | 0.549         | 0.554         | 0.551         |
| <b>Fill factor (%)</b>                           | 58.75         | 56.86         | 55.58         | 53.95         | 51.79         |
| <b>Power conversion efficiency (%)</b>           | 8.08          | 7.48          | 7.66          | 8.14          | 7.63          |

  

| <b>PbSe<sub>0.12</sub>S<sub>0.88</sub></b>       | <b>278 nm</b> | <b>300 nm</b> | <b>364 nm</b> | <b>400 nm</b> | <b>482 nm</b> | <b>559 nm</b> |
|--------------------------------------------------|---------------|---------------|---------------|---------------|---------------|---------------|
| <b>Short circuit current (mA/cm<sup>2</sup>)</b> | 25.01         | 24.94         | 26.21         | 28.04         | 28.25         | 27.70         |
| <b>Open circuit voltage (V)</b>                  | 0.550         | 0.550         | 0.548         | 0.549         | 0.546         | 0.545         |
| <b>Fill factor (%)</b>                           | 59.48         | 58.33         | 56.42         | 55.50         | 55.64         | 54.78         |
| <b>Power conversion efficiency (%)</b>           | 8.17          | 8.00          | 8.10          | 8.54          | 8.59          | 8.27          |

Table S 1. Summary of solar cell performance for devices with different anionic compositions and varied active layer thicknesses. The thickness values were estimated from cross-sectional SEM images.
